# Supplementary material for: Mitogen-activated protein kinase 4-like carrying an MEY motif instead of a TXY motif is involved in ozone tolerance and regulation of stomatal closure in tobacco
Source: PubMed Central journal article supplement (PMC4892734; doi:10.1093/jxb/erw173), 2016-04-28
Supplement: supp_erw173_supplementary_figures_S1_S12_tables_S1.pdf [file supp_erw173_supplementary_figures_S1_S12_tables_S1.pdf]

**Mitogen-activated protein kinase 4-like carrying a MEY motif instead of a TXY motif is involved in ozone tolerance and regulation of stomatal closure**

Yuki Yanagawa<sup>1</sup>, Hiroshi Yoda<sup>1</sup>, Kohei Osaki<sup>1</sup>, Yuta Amano<sup>2</sup>, Mitsuko Aono<sup>3</sup>, Shigemi Seo<sup>1</sup>, Kazuyuki Kuchitsu<sup>2</sup>, Ichiro Mitsuhashi<sup>1\*</sup>

**Supplementary Figure S1.** Comparison of the nucleotide sequences in open-reading frames among NtMPK4, NtMPK4L-1, and NtMPK4L-2. Bars indicate the regions used as IR constructs to generate NtMPK4L-silenced plants.

**Supplementary Figure S2.** Comparison of the amino acid sequences of NtMPK4L-1, NtMPK4L-2, and NtMPK4. A bar indicates the region used as an antigen in the production of the anti-NtMPK4L antibody. A square indicates the MEY and TXY motifs.

**Supplementary Figure S3.** Comparison of the amino acid sequences of SIMPK5 and SIMPK6. Bars indicate that sequence regions used as antigens against the anti-SIMPK5 and anti-SIMPK6 antibodies. A square indicates the MEY and TXY motifs.

**Supplementary Figure S4.** Quality test of the anti-NtMPK4L antibody. (A) SDS-PAGE analysis was performed using purified His-NtMPK4L-1 and His-NtMPK4 proteins. (B) Immunoblot analysis was performed using the anti-NtMPK4L antibody.

**Supplementary Figure S5.** Quality test of the anti-SIMPK5 and anti-SIMPK6 antibodies. (A) SDS-PAGE analysis was performed using purified His-SIMPK5 and His-SIMPK6 proteins. (B) Immunoblot analysis was performed using the anti-SIMPK5 or anti-SIMPK6 antibody.

**Supplementary Figure S6.** Subcellular localization of sGFP-fused NtMPK4 and NtMPK4L-1 in *N. tabacum*. Bar; 50  $\mu$ m.

**Supplementary Figure S7.** Crude extracts prepared from wounded leaves were separated by SDS-PAGE and stained with CBB. Tobacco leaves were wounded using a cork borer. After 0

and 10 min (A) or 0, 5, 10, 30, 60 and 120 min (B), the leaf discs were used for the preparation of crude extracts. (C) The expression level of *NtMPK4L* transcript was measured at 0, 5, 10, 30, 60 and 120 min after wounding. (D) Tobacco leaves expressing HA-SIMP6, or HA-SIMP6<sup>Y203F</sup> or HA-sGFP by agroinfiltration were wounded using a cork borer. After 0, 10 and 30 min, the leaf discs were used for the preparation of crude extracts. CBB staining or an immunoblot analysis using an anti-HA antibody was performed.

**Supplementary Figure S8.** SIMPK6 activity was upregulated by wounding. Phosphorylation of MBP as a substrate was detected by autoradiography. (A) Tobacco leaves were wounded using a cork borer. After 0 and 10 min, the leaf discs were used for the measurement of SIMPK5 or SIMPK6 activity. (B) *In vitro* activation of His-SIMP5 or His-SIMP6 by GST-SIMKK1 or GST-SIMKK1<sup>EE</sup> was examined.

**Supplementary Figure S9.** The relative expression levels of *NtMPK4L* and *NtMPK4* transcripts were measured in first-generation *NtMPK4L*-silenced plants. Five *NtMPK4L*-IR lines were compared with vector control plants.

**Supplementary Figure S10.** Leaves from wild-type (WT), *NtMPK4*-IR6 (4-IR6), *NtMPK4L*-IR6 (4L-IR6), and *NtMPK4L*-IR8 (4L-IR8) plants were wounded using a cork borer. After 0 or 10 min, the leaf discs were used for the preparation of crude extracts. CBB staining was performed.

**Supplementary Figure S11.** Relative expression levels of *NtMPK4* and *NtMPK4L* transcripts were measured. Error bars indicate standard deviations determined from three independent biological replicates. Asterisks indicate significant differences from analyses using Student's t-test compared with the relevant vector control at  $p < 0.05$  (\*).

**Supplementary Figure S12.** Wild-type tobacco leaves were exposed by ozone. (A) After 0 and 1 h, crude extracts were prepared. The crude extracts were separated by SDS-PAGE and stained

with CBB. (B) The expression levels of both *NtMPK4* and *NtMPK4L* transcripts were measured.

**Supplementary Table S1.** Primers used in this study.

# Supplementary Figure S1

|           |      |                                                                 |      |
|-----------|------|-----------------------------------------------------------------|------|
| NtMPK4    | 1    | CTTCACATCTTTTTCTTGAAAGGCTACCGACACTAACAGGCCCATTAATAAACTGTCTTTG   | 60   |
| NtMPK4L-1 | 0    | -----                                                           | 0    |
| NtMPK4L-2 | 0    | -----                                                           | 0    |
| NtMPK4    | 61   | AACTGGGTTTGGCCAGATTTCAAFTTTTCGAGAAAAAARAAATTTTCTAAAT            | 119  |
| NtMPK4L-1 | 1    | -----CTGAAATGTCCAAAGGCTCTTCTTTCTTTTGGTCTAAATTTTCTGTTA           | 50   |
| NtMPK4L-2 | 1    | -----CTGAAATGTCCAAAGGCTCTTCTTTCTTTTGGTCTAAATTTTCTGTTA           | 52   |
| NtMPK4    | 120  | TTTTCTGTGTTTAAATTCCTATGCTGATGCTAAATTCATCTGATCAATTTTCAAAATTAAT   | 179  |
| NtMPK4L-1 | 51   | TTTTCTGTGTTTAAATTCCTATGCTGATGCTAAATTCATCTGATCAATTTTCAAAATTAAT   | 107  |
| NtMPK4L-2 | 53   | TTTTCTGTGTTTAAATTCCTATGCTGATGCTAAATTCATCTGATCAATTTTCAAAATTAAT   | 101  |
| NtMPK4    | 180  | TTTGGAGTTTCCAAACACATGGGGTCTGATGTCAGTATAATGTGATGGTATCTC          | 239  |
| NtMPK4L-1 | 108  | TTAAGAGGAGTTCCAAACACATGGGGTCTGATGTCAGTATAATGTGATGGTATCTC        | 167  |
| NtMPK4L-2 | 102  | TTAAGAGGAGTTCCAAACACATGGGGTCTGATGTCAGTATAATGTGATGGTATCTC        | 161  |
| NtMPK4    | 240  | TTTGAAGTTTCAAGAAAATATGTTCTCCCTATTAGACCTATTGGTCGTGGTCTAATGGC     | 296  |
| NtMPK4L-1 | 168  | TTTGAAGTTTCAAGAAAATATGTTCTCCCTATTAGACCTATTGGTCGTGGTCTAATGGC     | 227  |
| NtMPK4L-2 | 162  | TTTGAAGTTTCAAGAAAATATGTTCTCCCTATTAGACCTATTGGTCGTGGTCTAATGGC     | 221  |
| NtMPK4    | 297  | TTTTTTGCTGCTATGAATCTGAACTGAGGAGACCTGAGGAGTAGCAATTAAGAGATTGGC    | 356  |
| NtMPK4L-1 | 228  | TTGGTTTGTGCTGCTATGAATCTGAACTGAGGAGACCTGAGGAGTAGCAATTAAGAGATTGGC | 287  |
| NtMPK4L-2 | 222  | TTGGTTTGTGCTGCTATGAATCTGAACTGAGGAGACCTGAGGAGTAGCAATTAAGAGATTGGC | 281  |
| NtMPK4    | 357  | AATGCATTTGATAATGTAATAGATGCAAAAAGGACATTAAGAGAGATAAAGCTTCTGAT     | 416  |
| NtMPK4L-1 | 288  | AATGCATTTGATAATGTAATAGATGCAAAAAGGACATTAAGAGAGATAAAGCTTCTGAT     | 347  |
| NtMPK4L-2 | 282  | AATGCATTTGATAATGTAATAGATGCAAAAAGGACATTAAGAGAGATAAAGCTTCTGAT     | 341  |
| NtMPK4    | 417  | CACATGGATCATGAGAATGTTTTCGCAATTAAGATGTTTATAAGGCTCTCAAAATTAAG     | 476  |
| NtMPK4L-1 | 348  | CACATGGATCATGAGAATGTTTTCGCAATTAAGATGTTTATAAGGCTCTCAAAATTAAG     | 407  |
| NtMPK4L-2 | 342  | CACATGGATCATGAGAATGTTTTCGCAATTAAGATGTTTATAAGGCTCTCAAAATTAAG     | 401  |
| NtMPK4    | 477  | AAATTCATGATGTTTACATTTGTTTATGAACTGATGGACACTGATCTTCATCAGATTATT    | 536  |
| NtMPK4L-1 | 408  | AAATTCATGATGTTTACATTTGTTTATGAACTGATGGACACTGATCTTCATCAGATTATT    | 467  |
| NtMPK4L-2 | 402  | AAATTCATGATGTTTACATTTGTTTATGAACTGATGGACACTGATCTTCATCAGATTATT    | 461  |
| NtMPK4    | 537  | TTTCCAACCAACAGTTGACTGATGAACTGCGGATTTTCTTACCAATTTATTCGGA         | 596  |
| NtMPK4L-1 | 468  | TTTCCAACCAACAGTTGACTGATGAACTGCGGATTTTCTTACCAATTTATTCGGA         | 527  |
| NtMPK4L-2 | 462  | TTTCCAACCAACAGTTGACTGATGAACTGCGGATTTTCTTACCAATTTATTCGGA         | 521  |
| NtMPK4    | 597  | GGACTTAAGTACATTCACCTGCCCCATCTGTCATCGTGTATTAATAAAGCAGCAATTTG     | 656  |
| NtMPK4L-1 | 528  | GGACTTAAGTACATTCACCTGCCCCATCTGTCATCGTGTATTAATAAAGCAGCAATTTG     | 587  |
| NtMPK4L-2 | 522  | GGACTTAAGTACATTCACCTGCCCCATCTGTCATCGTGTATTAATAAAGCAGCAATTTG     | 581  |
| NtMPK4    | 657  | TTTCTCAATGCAAAAATGTCACCTGAAAGATTGGAGATTTTGGCTTGCAGAGCAACT       | 716  |
| NtMPK4L-1 | 588  | TTTCTCAATGCAAAAATGTCACCTGAAAGATTGGAGATTTTGGCTTGCAGAGCAACT       | 647  |
| NtMPK4L-2 | 582  | TTTCTCAATGCAAAAATGTCACCTGAAAGATTGGAGATTTTGGCTTGCAGAGCAACT       | 641  |
| NtMPK4    | 717  | BAGACAGATTTTCATGATGGAATATTGTTTACACGCTGGTATCGTGACCAAGATTGGTA     | 776  |
| NtMPK4L-1 | 648  | BAGACAGATTTTCATGATGGAATATTGTTTACACGCTGGTATCGTGACCAAGATTGGTA     | 707  |
| NtMPK4L-2 | 642  | BAGACAGATTTTCATGATGGAATATTGTTTACACGCTGGTATCGTGACCAAGATTGGTA     | 701  |
| NtMPK4    | 777  | TAAATTTGTTTACAGATGATACTGCAAAATGATGTTTGGTCAGTAGGTCGACTACTGGT     | 836  |
| NtMPK4L-1 | 708  | TAAATTTGTTTACAGATGATACTGCAAAATGATGTTTGGTCAGTAGGTCGACTACTGGT     | 767  |
| NtMPK4L-2 | 702  | TAAATTTGTTTACAGATGATACTGCAAAATGATGTTTGGTCAGTAGGTCGACTACTGGT     | 761  |
| NtMPK4    | 837  | BAAATATTGACAAGACAACCCCTTTTCCCGGCAGAGATTAATGACCAAGATTGAGACT      | 895  |
| NtMPK4L-1 | 768  | BAAATATTGACAAGACAACCCCTTTTCCCGGCAGAGATTAATGACCAAGATTGAGACT      | 826  |
| NtMPK4L-2 | 762  | BAAATATTGACAAGACAACCCCTTTTCCCGGCAGAGATTAATGACCAAGATTGAGACT      | 820  |
| NtMPK4    | 896  | TATCACTGAGCTCATAGGCTCACCTGATGATGCTGCTTTGGTTTCTCCGGAGTATAAA      | 955  |
| NtMPK4L-1 | 827  | TATCACTGAGCTCATAGGCTCACCTGATGATGCTGCTTTGGTTTCTCCGGAGTATAAA      | 886  |
| NtMPK4L-2 | 821  | TATCACTGAGCTCATAGGCTCACCTGATGATGCTGCTTTGGTTTCTCCGGAGTATAAA      | 880  |
| NtMPK4    | 956  | TGCTTCAAGATACTTACCTGAGCTCCCACTATGTTTCAACAAATTTTGGCTGAGATT       | 1015 |
| NtMPK4L-1 | 887  | TGCCCCAAGATACTTACCTGAGCTCCCACTATGTTTCAACAAATTTTGGCTGAGATT       | 946  |
| NtMPK4L-2 | 881  | TGCCCCAAGATACTTACCTGAGCTCCCACTATGTTTCAACAAATTTTGGCTGAGATT       | 940  |
| NtMPK4    | 1016 | CCCTAATTCATCTCCCTGAGCTGTGATTTGGTTGAAAAAATGCTCATCTTTGATCCAAG     | 1075 |
| NtMPK4L-1 | 947  | CCCTAATTCATCTCCCTGAGCTGTGATTTGGTTGAAAAAATGCTCATCTTTGATCCAAG     | 1006 |
| NtMPK4L-2 | 941  | CCCTAATTCATCTCCCTGAGCTGTGATTTGGTTGAAAAAATGCTCATCTTTGATCCAAG     | 1000 |
| NtMPK4    | 1076 | CAGGCCTTTACTTTGATGAGCTCTCTCCATCTTACCTTGGCCCTTTCATGATAT          | 1135 |
| NtMPK4L-1 | 1007 | CAGGCCTTTACTTTGATGAGCTCTCTCCATCTTACCTTGGCCCTTTCATGATAT          | 1066 |
| NtMPK4L-2 | 1001 | CAGGCCTTTACTTTGATGAGCTCTCTCCATCTTACCTTGGCCCTTTCATGATAT          | 1060 |
| NtMPK4    | 1136 | CAATGAGGAGCCCTTTTGTCTTAATCTTTTCAAGTTTGGCTTTGAGCAGCCATCTTTAC     | 1195 |
| NtMPK4L-1 | 1067 | CAACGAGGAGCCCTTTTGTCTTAATCTTTTCAAGTTTGGCTTTGAGCAGCCATCTTTAC     | 1126 |
| NtMPK4L-2 | 1061 | CAACGAGGAGCCCTTTTGTCTTAATCTTTTCAAGTTTGGCTTTGAGCAGCCATCTTTAC     | 1120 |
| NtMPK4    | 1196 | TGAAGATAAATCAAGGAGCTCATCTGGAGGGAACTCGTAAATTAATCTCCATCCAAC       | 1255 |
| NtMPK4L-1 | 1127 | TGAAGATAAATCAAGGAGCTCATCTGGAGGGAACTCGTAAATTAATCTCCATCCAAC       | 1186 |
| NtMPK4L-2 | 1121 | TGAAGATAAATCAAGGAGCTCATCTGGAGGGAACTCGTAAATTAATCTCCATCCAAC       | 1180 |
| NtMPK4    | 1256 | TCAATGAAAGAGATGTGGTTATATGATGATACAAATAGAAATTTGGTTATTTAACTTT      | 1315 |
| NtMPK4L-1 | 1187 | TCAATGAAAGAGATGTGGTTATATGATGATACAAATAGAAATTTGGTTATTTAACTTT      | 1244 |
| NtMPK4L-2 | 1181 | TCAATGAAAGAGATGTGGTTATATGATGATACAAATAGAAATTTGGTTATTTAACTTT      | 1238 |
| NtMPK4    | 1316 | TGATATACTGTTTCAATTTTGTAAATGTTCCCTGATGAAATTAATCTCCATCCAAC        | 1374 |
| NtMPK4L-1 | 1245 | TGATATACTGTTTCAATTTTGTAAATGTTCCCTGATGAAATTAATCTCCATCCAAC        | 1304 |
| NtMPK4L-2 | 1239 | TGATATACTGTTTCAATTTTGTAAATGTTCCCTGATGAAATTAATCTCCATCCAAC        | 1298 |
| NtMPK4    | 1375 | GG-----FGAGTTC                                                  | 1383 |
| NtMPK4L-1 | 1305 | GGAGCTGTTGAGTTC                                                 | 1319 |
| NtMPK4L-2 | 1299 | GGAGCTGTTGAGTTC                                                 | 1313 |

# Supplementary Figure S2

|           |     |                                                                |     |
|-----------|-----|----------------------------------------------------------------|-----|
| NtMPK4L-1 | 1   | MSVDSSSGDHSSNIRGVPTHGGRYVQYNVHGSLFEVSRKYVPPPIRPIGRGANGMVCAAM   | 59  |
| NtMPK4L-2 | 1   | MSVDSSSGDHSSNIRGVPTHGGRYVQYNVHGSLFEVSRKYVPPPIRPIGRGANGMVCAAM   | 59  |
| NtMPK4    | 1   | MEATISGDQGVQS-NFKGVPTHGGRYVQYNVHGSLFEVSRKYVPL-RPWGRGAIISIVCAAM | 58  |
|           |     |                                                                |     |
| NtMPK4L-1 | 60  | NSETREEVAIKKIGNAFDNVIDAKRTLREIKLLSHMDHENVIAIKDVIRPPQKKNFNDVY   | 119 |
| NtMPK4L-2 | 60  | NSETREEVAIKKIGNAFDNVIDAKRTLREIKLLSHMDHENVIAIKDVIRPPQKKNFNDVY   | 119 |
| NtMPK4    | 59  | NSETREEVAIKKIGNAFDNVIDAKRTLREIKLLSHMDHENVIAIKDVIRPPQKKNFNDVY   | 118 |
|           |     |                                                                |     |
| NtMPK4L-1 | 120 | IVYELMDTDLHQIIHSNQQLTDEHCRHFLYQVLRGLKYYIHSANILHRDLKPSNLLVNAKC  | 179 |
| NtMPK4L-2 | 120 | IVYELMDTDLHQIIHSNQQLTDEHCRHFLYQVLRGLKYYIHSANILHRDLKPSNLLVNAKC  | 179 |
| NtMPK4    | 119 | IVYELMDTDLHQIISNQQLTDEHCRHFLYQVLRGLKYYIHSANILHRDLKPSNLLVNAKC   | 178 |
|           |     |                                                                |     |
| NtMPK4L-1 | 180 | DLKIGDFGLARTTTTETDFMMEYCVTRWYRAPELLNCSEYTSVIDVWSVGCILGEILTRQ   | 239 |
| NtMPK4L-2 | 180 | DLKIGDFGLARTTTTETDFMMEYCVTRWYRAPELLNCSEYTSVIDVWSVGCILGEILTRQ   | 239 |
| NtMPK4    | 179 | DLKIGDFGLARTTTTETDFMMEYCVTRWYRAPELLNCSEYTSVIDVWSVGCILGEILTRQ   | 238 |
|           |     |                                                                |     |
| NtMPK4L-1 | 240 | PLFPPGRDYVHQLRLITELIGSPDDASLGFLRSNNARRYVRQLPRYPQQFSARFPNSSPR   | 299 |
| NtMPK4L-2 | 240 | PLFPPGRDYVHQLRLITELIGSPDDASLGFLRSNNARRYVRQLPRYPQQFSARFPNSSPR   | 299 |
| NtMPK4    | 239 | PLFPPGRDYVHQLRLITELIGSPDDASLGFLRSNNARRYVRQLPRYPQQFSARFPNSSPR   | 298 |
|           |     |                                                                |     |
| NtMPK4L-1 | 300 | AVDLEKMLIFDPSRRITVDEALSHPYLAPLHDINEEPCPRPFLDFEQPSFTEDNIKE      | 359 |
| NtMPK4L-2 | 300 | AVDLEKMLIFDPSRRITVDEALSHPYLAPLHDINEEPCPRPFLDFEQPSFTEDNIKE      | 359 |
| NtMPK4    | 299 | AVDLEKMLIFDPSRRITVDEALSHPYLAPLHDINEEPCPRPFLDFEQPSFTEDNIKE      | 358 |
|           |     |                                                                |     |
| NtMPK4L-1 | 360 | LIWREAVKFNPDPTH                                                | 374 |
| NtMPK4L-2 | 360 | LIWREAVKFNPDPTH                                                | 374 |
| NtMPK4    | 359 | LIWREAVKFNPDPTH                                                | 373 |

# Supplementary Figure S3

S1MPK5 1 M--EASITGDHGVQSNFRGVPTHGGRYVQYNVYGNLFEVSKKYVPL-RPVGRGAYGIVCAA 57  
 S1MPK6 1 MSLDSSADHGGHSNIRGVPTHGGRYVQYNVHGS LFEVSKKYVVPPIRPIGRGANGMVCAA 60

S1MPK5 58 LNSETREEVAIKKIGNAFDNRIDAKRTLREIKLLRHMDHENVIAIRDIIRPPQTEINFNDV 117  
 S1MPK6 61 VNSETREEVAIKKIGNAFDNVIDAKRTLREIKLLSHMDHENVIAIKDVIIRPPQKKNFNDV 120

S1MPK5 118 YIVYELMDTDLHQIVRSNQQLTDHCRYFLYQILRGLKYIHSANVLHRDLKPSNLFLLNAN 177  
 S1MPK6 121 YIVYELMDTDLHQIIRSNQQLTDEHCRYFLYQILRGLKYIHSANILHRDLKPSNLLVNAK 180

S1MPK5 178 CDLKVGDFGLARTTSETDFMIEYVTRWYRAPELLNCSEYTA AIDIWSVGCILGEMMTR 237  
 S1MPK6 181 CDLKIGDFGLARTTSETDFMIEYCVTRWYRAPELLNCSEYTS AIDIWSVGCILGELLTR 240

S1MPK5 238 QPLFPGRDYVHQLKRLITELIGSPDDASLGFLRSNNARRVYRQLPQYPRQQFAAKFPNASP 297  
 S1MPK6 241 QPLFPGRDYVHQLKRLITELIGSPDDASLGFLRSNNARRVYRQLPQYPRQQFAAKFPNSSP 300

S1MPK5 298 GAVDILLEKMLVFDPSKRVIVDEALCHPYLAPLHDINEEPVCPRPFSDFEFQPSFTEENIK 357  
 S1MPK6 301 RAVDILLEKMLIFDPSRRIVADEALCHPYLAPLHEINEEPVCPRPFSLDFEQPSLLEDNIK 360

S1MPK5 358 ELIWRETVNENFPDSTH 373  
 S1MPK6 361 ELIWREAANKENPDPHTH 376

# Supplementary Figure S4

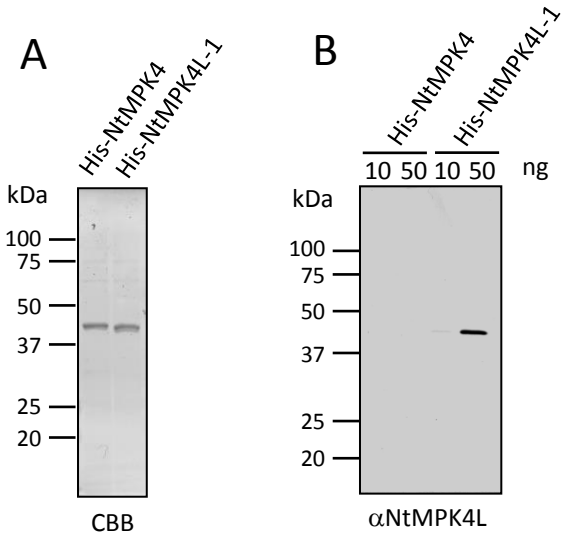

# Supplementary Figure S5

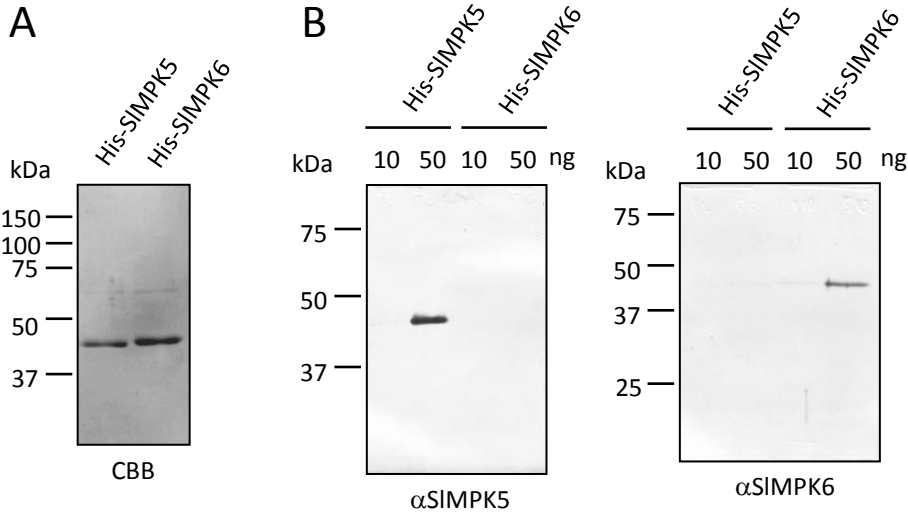



# Supplementary Figure S6

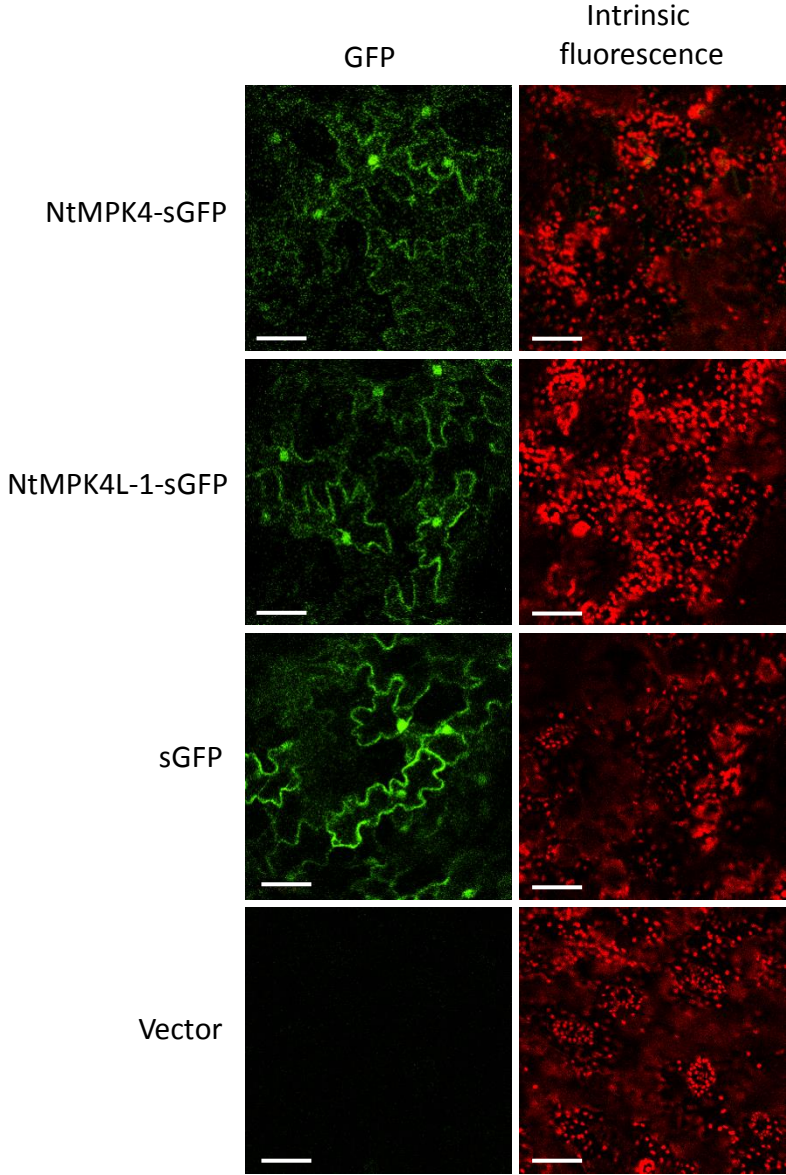

# Supplementary Figure S7

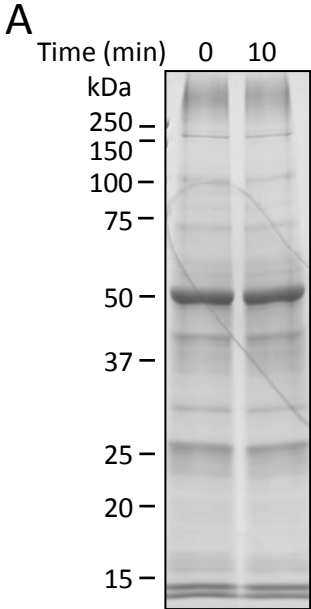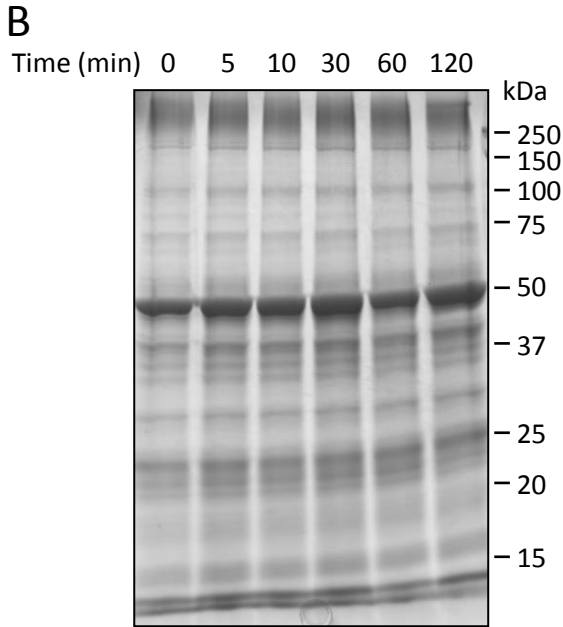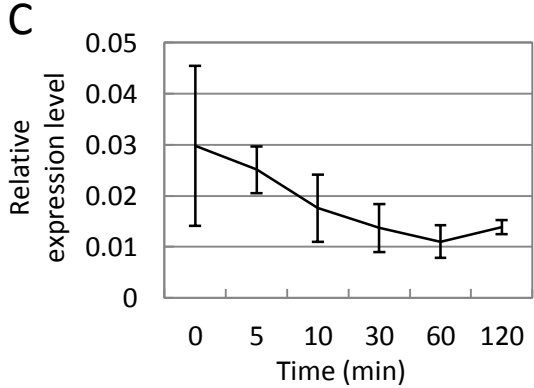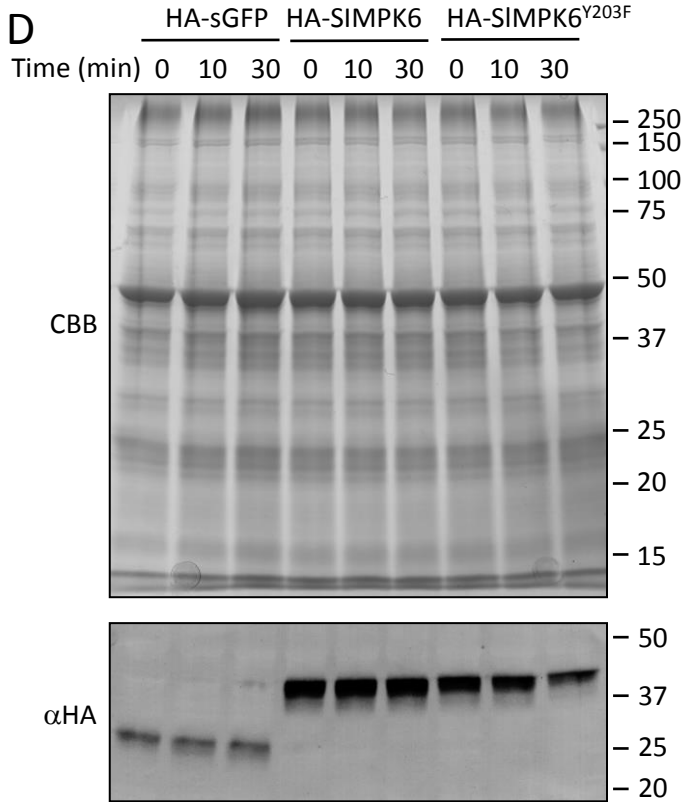

# Supplementary Figure S8

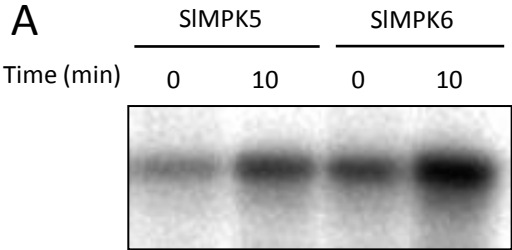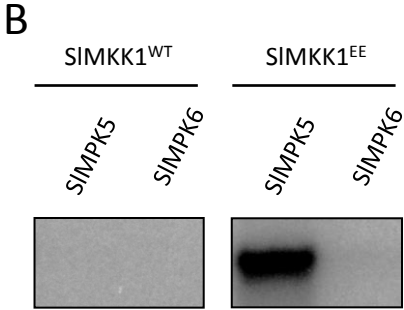

# Supplementary Figure S9

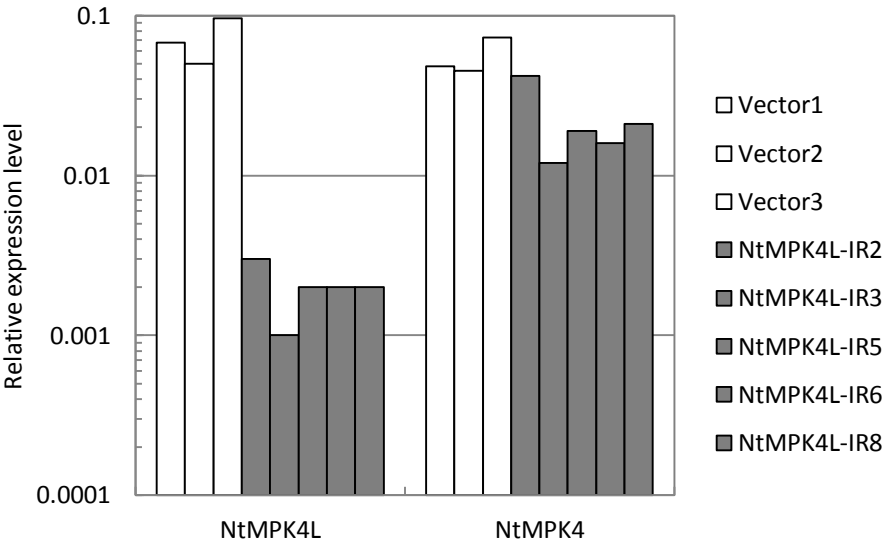

Supplementary Figure S10

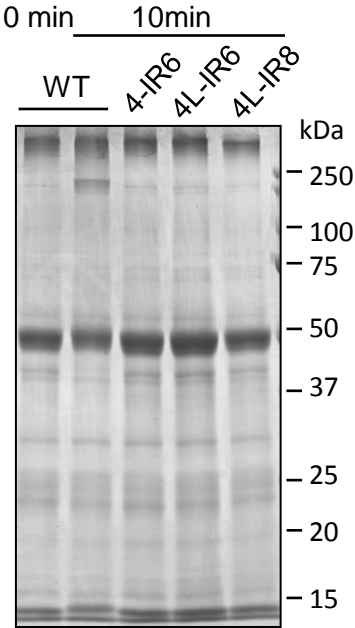

Supplementary Figure S11

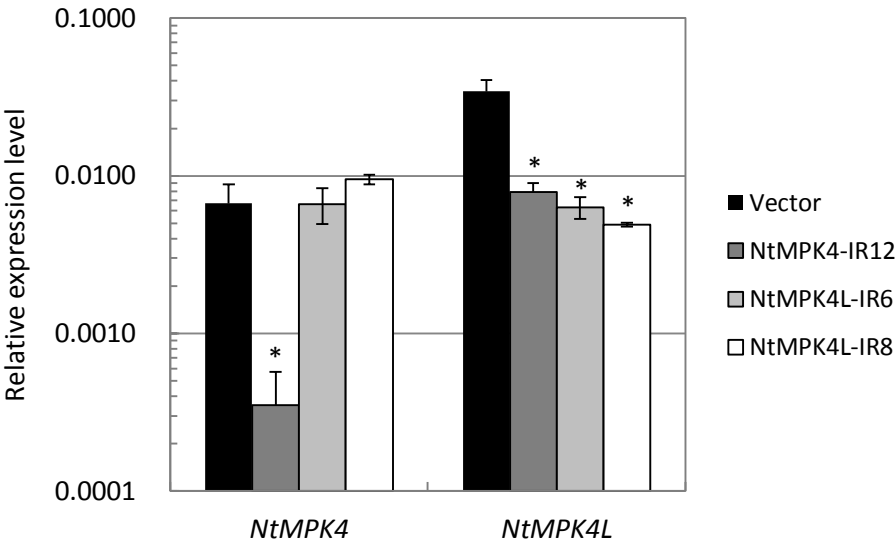

# Supplementary Figure S12

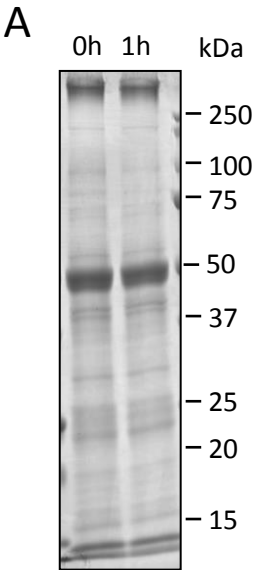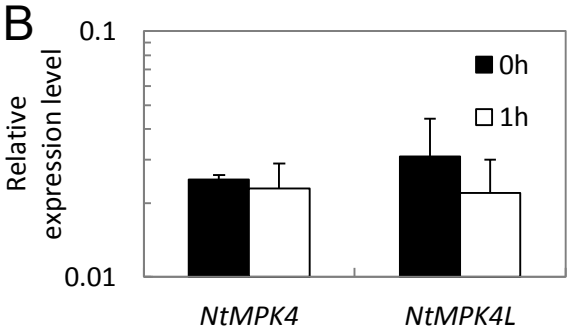

Supplementary Table S1 Primers used in this study

| Primer                  | Sequence (5' - 3')                    | Application                 |
|-------------------------|---------------------------------------|-----------------------------|
| NtMMPK4L Dege 5'        | GGIGTICCIACICAYGGIGG                  | Cloning                     |
| NtMMPK4L Dege 3'        | TGIGTIGGRTCIGGRTTTRAAAYTTIACIGC       | Cloning                     |
| NtMPK4L 5'              | CTGAAATGTCCAAAGGCTCTTC                | Cloning                     |
| NtMPK4L 3'              | GAACTCAACAGCTCCACCATA                 | Cloning                     |
| 5'+3'UTR BamHI 5'       | TTAGGATCCCTGAAACCAAAGGCTC             | Silencing vector            |
| 5'UTR+3'UTR TR Rv       | CAGGATTAATTTTACAGCCCATGTGTTGGTACTCCTC | Silencing vector            |
| 3'UTR Fw                | GCTGTAAAATTTAATCCTGATCC               | Silencing vector            |
| 5'+3'UTR XhoI 3'        | TTACTCGAGGAACTCAACAGCTCCACC           | Silencing vector            |
| 5'+3'UTR SacI 5'        | TTAGAGCTCCTGAAATGTCCAAAGGCTC          | Silencing vector            |
| 5'+3'UTR KpnI 3'        | TTAGGTACCGAACTCAACAGCTCCACC           | Silencing vector            |
| NtActin RT 51           | GGGTTTGCTGGAGATGATGCT                 | qPCR                        |
| NtActin RT 31           | GCTTCGTCACCAACATATGCAT                | qPCR                        |
| NtMPK4L-Fw-2            | TCAGAGTATACATCGGCAATTGATG             | qPCR                        |
| NtMPK4L-Rv-2            | ATAAGTCTCAACTGGTGTACATAATCTC          | qPCR                        |
| NtMPK4-5'-1             | GTTGGGTTGATTTCTATGGAAG                | qPCR                        |
| NtMPK4-rv-1             | CATAACAATGTAGACATCATTGAAATTCTC        | qPCR                        |
| NtMPK4 NdeI 5'          | TTCCATATGATGGAAGCAATTTTCAGGTGATC      | Recombinant protein         |
| NtMPK4 BamHI 3'         | TTCGGATCCTCAGTGAGTTGGATCTGG           | Recombinant protein         |
| NtMPK4L NdeI 5'         | TTCCATATGATGTCTGTTGATTTCGAGTTC        | Recombinant protein         |
| NtMPK4L BamHI 3'        | TTCGGATCCTCAATGAGTTGGATCAGG           | Recombinant protein         |
| 5' NdeI-SIMPK5          | CTACATATGGATCATGACAATGTGATT           | Recombinant protein         |
| 3' BamHI-SIMPK5         | ATCGGATCCTCAGTGAGTTGAATCTGGA          | Recombinant protein         |
| 5' NdeI-SIMPK6          | CATATGTCTCTTGATTCAAGTTCAGCT           | Recombinant protein         |
| 3' BamHI-SIMPK6         | GGATCCTCAATGAGTTGGATCA                | Recombinant protein         |
| 5' EcoRI-SIMKK1         | GAATTCATGAAGAAAGGATCTTTTGCA           | Recombinant protein         |
| 3' SalI-SIMKK1          | GTCGACTTATAGCTCAGTAAGTGT              | Recombinant protein         |
| SIMKK1 <sup>EE</sup> Fw | GCAAGCGAATCTGGACTGGCCAATGAATTTGTC     | Recombinant protein         |
| SIMKK1 <sup>EE</sup> Rv | GACAAATTCATTGGCCAGTCCAGATTCGCTTGC     | Recombinant protein         |
| SIMPK6YF Fw             | TTCATGATGGAATTTTGTGTGACACGCTGGTACCGT  | Immuno complex kinase assay |
| SIMPK6YF Rv             | ACGGTACCAGCGTGTACACAAAATTCCATCATGAA   | Immuno complex kinase assay |
| SIMPK6-BamHI Fw         | CTAGGATCCATGTCTCTTGATTCAAGTTCA        | Immuno complex kinase assay |
| SIMPK6-XhoI Rv          | ATTCTCGAGTCAATGAGTTGGATCAGGATT        | Immuno complex kinase assay |
| EcoRI-sGFP              | TACGAATTCATGGTGAGCAAGGGCGAGG          | Immuno complex kinase assay |
| sGFP-XhoI               | AGTCTCGAGTTACTTGTACAGCTCGTCCATGC      | Immuno complex kinase assay |
| SpeI-sGPF-F             | TACTAGTATGGTGAGCAAGGGCGAGGAG          | Subcellular localization    |
| SacI-sGFP-R             | TGAGCTCTTACTTGTACAGCTCGTCCATG         | Subcellular localization    |
| XbaI-NtMPK4-F           | TATCTAGAATGGAAGCAATTTTCAGGTGATCAAG    | Subcellular localization    |
| EcoRI-NtMPK4-R          | AGAATTCGTGAGTTGGATCTGGATTAATTTTAC     | Subcellular localization    |
| XbaI-NtMPK4L-1-F        | TATCTAGAATGTCTGTTGATTTCGAGTTTCAGG     | Subcellular localization    |
| EcoRI-NtMPK4L-1-R       | AGAATTCATGAGTTGGATCAGGATTAATTTTACAGC  | Subcellular localization    |
